# Supplementary material for: Endoscopic Ultrasound-Guided, Percutaneous, and Transjugular Liver Biopsy: A Comparative Systematic Review and Meta-Analysis
Source: PubMed Central journal article supplement — Clin Endosc. 2020 Sep 29;53(5):583–93. doi: 10.5946/ce.2019.211 (PMC7548145; doi:10.5946/ce.2019.211), 2020-09-29
Supplement: ce-2019-211-suppl3.pdf [file ce-2019-211-suppl3.pdf]

**Supplementary Table 1.** Endoscopic Ultrasound-Guided, Percutaneous, and Transjugular Liver Biopsy: Cumulative Pooled Results

|                              | <b>Cumulative<br/>EUS-Guided (EUSLB)<sup>a)</sup></b> | <b>Clinically Relevant<br/>EUS-Guided (EUSLB)<sup>b)</sup></b> | <b>PCLB</b>                                        | <b>TJLB</b>                                        |
|------------------------------|-------------------------------------------------------|----------------------------------------------------------------|----------------------------------------------------|----------------------------------------------------|
| No. of patients              | 301                                                   | 188                                                            | 176                                                | 179                                                |
| Mean age (yr)                | 51.75±2.60                                            | 52.17±3.06                                                     | 50.50±2.84                                         | 52.58±2.69                                         |
| Male (%)                     | 35.52%                                                | 41.81%                                                         | 69.96%                                             | 54.07%                                             |
| Adequacy of specimens (%)    | 93.51%<br>(95% CI, 60.41 to 99.27)<br>$I^2=88.40\%$   | 97.72%<br>(95% CI, 93.16 to 99.26)<br>$I^2=0.00\%$             | 98.27%<br>(95% CI, 93.31 to 99.57)<br>$I^2=0.00\%$ | 97.61%<br>(95% CI, 93.39 to 99.16)<br>$I^2=0.00\%$ |
| Complete portal triads       | 13.37±5.41                                            | 14.23±2.84                                                     | 13.18±2.11                                         | 13.88±3.19                                         |
| Total specimen length (mm)   | 34.48±8.00                                            | 34.48±8.00                                                     | 22.9±5.36                                          | 28.07±8.66                                         |
| Length of longest piece (mm) | 7.96±4.46                                             | 10.89±3.37                                                     | 12.42±1.21                                         | 10.95±1.31                                         |
| Adverse event rate (%)       | 10.11%<br>(95% CI, 1.88 to 39.70)<br>$I^2=56.21\%$    | 10.11%<br>(95% CI, 1.88 to 39.70)<br>$I^2=56.21\%$             | 15.21%<br>(95% CI, 7.17 to 29.39)<br>$I^2=0.00\%$  | 7.75%<br>(95% CI, 2.15 to 21.50)<br>$I^2=0.00\%$   |

CI, confidence interval; EUSLB, endoscopic ultrasound-guided liver biopsy; PCLB, percutaneous liver biopsy; TJLB, transjugular liver biopsy.

<sup>a)</sup>Includes studies with fine needle aspiration, fine needle biopsy needles not in routine clinical practice.

<sup>b)</sup>Excludes studies with fine needle aspiration, fine needle biopsy needles not in routine clinical practice.
