# Supplementary material for: Endoscopic Ultrasound-Guided, Percutaneous, and Transjugular Liver Biopsy: A Comparative Systematic Review and Meta-Analysis
Source: PubMed Central journal article supplement — Clin Endosc. 2020 Sep 29;53(5):583–93. doi: 10.5946/ce.2019.211 (PMC7548145; doi:10.5946/ce.2019.211), 2020-09-29
Supplement: ce-2019-211-suppl4.pdf [file ce-2019-211-suppl4.pdf]

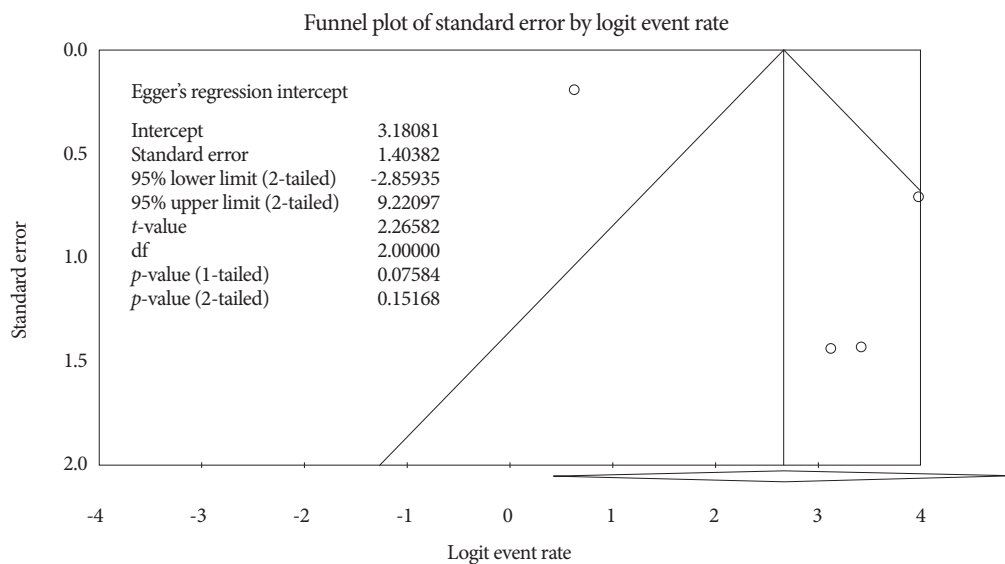

(A)

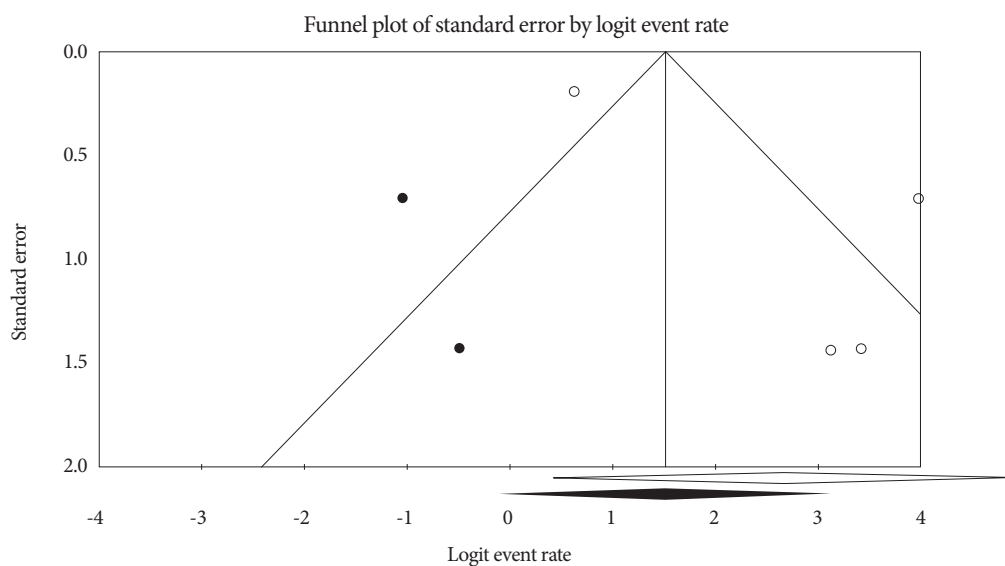

(B)

**Supplementary Fig. 1.** (A) Funnel plot of publication bias and Egger's regression test for included studies to assess adequacy of endoscopic ultrasound-guided liver biopsy. (B) Funnel plot of publication bias with Duval and Tweedie's trim and fill method.
